# Supplementary material for: A bimetallic strategy to modulate electronic metal support interaction in Co 3 O 4 (111)-based catalysts: the case of supported Rh–Pt core–shell nanoparticles
Source: Royal Society of Chemistry journal article supplement (doi:10.1039/d5cp04654h), 2026-01-01
Supplement: d5cp04654h1.pdf [file d5cp04654h1.pdf]

## Supplementary Information

### **A Bimetallic Strategy to Modulate Electronic Metal Support Interaction in Co<sub>3</sub>O<sub>4</sub>(111)-Based Catalysts: The Case of Supported Rh–Pt Core-Shell Nanoparticles**

Jonas Hauner,<sup>a</sup> Alexander Simanenko,<sup>a</sup> Lukáš Fusek,<sup>b</sup> Tomáš Skála,<sup>b</sup> Nataliya Tsud,<sup>b</sup> Firas Faisal,<sup>a</sup> Sascha Mehl,<sup>c</sup> Jörg Libuda,<sup>a</sup> Yaroslava Lykhach<sup>\*a</sup>

<sup>a</sup>*Interface Research and Catalysis, ECRC, Friedrich-Alexander-Universität Erlangen-Nürnberg, Egerlandstrasse 3, 91058 Erlangen, Germany*

<sup>b</sup>*Charles University, Faculty of Mathematics and Physics, Department of Surface and Plasma Science, V Holešovičkách 2, Prague, 18000, Czech Republic*

<sup>c</sup>*Elettra-Sincrotrone Trieste SCpA, Strada Statale 14, km 163.5, Basovizza-Trieste, 34149, Italy*

**S1. Structure of  $\text{Co}_3\text{O}_4(111)$  films prepared on Ir(100) substrate.**

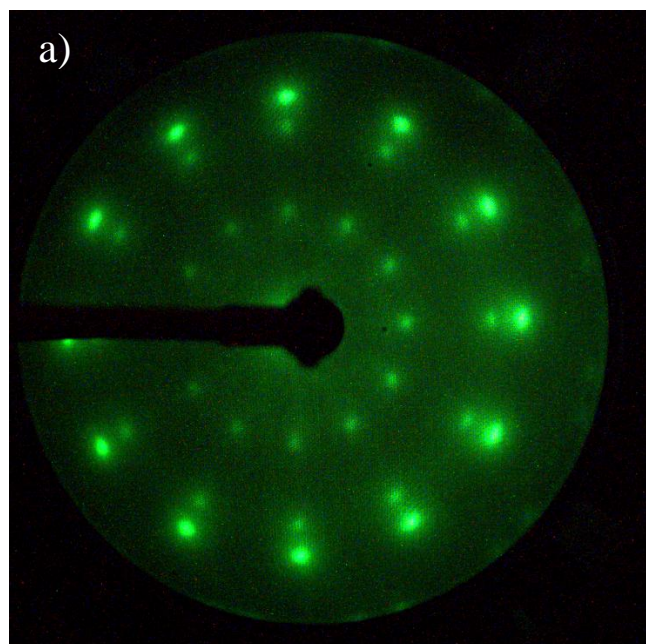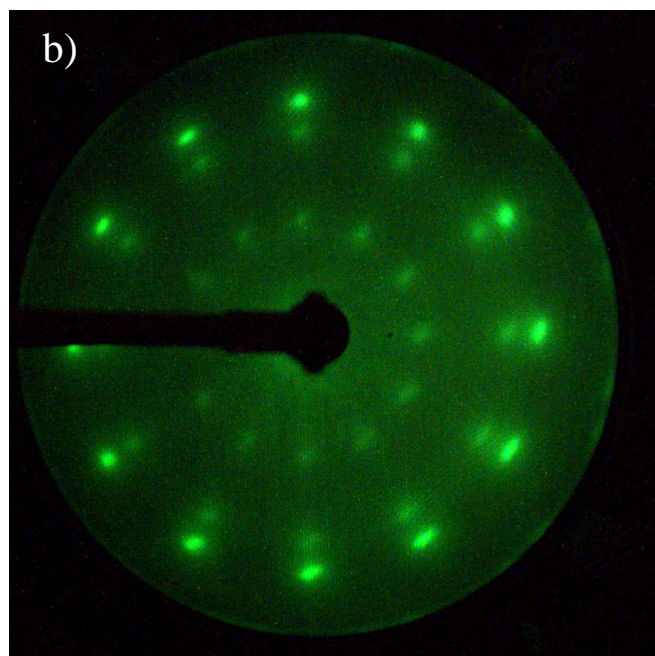

**Figure S1.** LEED patterns obtained from  $\text{Co}_3\text{O}_4(111)$  films on Ir(100) used as supports for Rh@Pt (a) and Pt@Rh (b) nanoparticles. The LEED patterns were obtained with electron beam energy of 67.0 eV.
